# Supplementary material
Source: Research Square preprint supplement (doi:10.21203/rs.3.rs-9555959/v1)
Supplement: Supplementary file 1 [file c236b1f319c16fc50a133109.docx]

Supplementary data

**Enhanced endoglucanase production using agro-waste in solid-state fermentation by *Penicillium citrinum* M5**

**Hang T. T. Nguyena*, Thien-Nhu Phana, Gia-Bao Bang Nguyena, Bao-Tran Huynha, Truong-Giang Ngoc Nguyena, Tuyet-Nhung Trana**

a Faculty of Applied Sciences, Ton Duc Thang University, Ho Chi Minh city, 700000, Vietnam

* Corresponding author: [nguyenthithuhang@tdtu.edu.vn](mailto:nguyenthithuhang@tdtu.edu.vn)


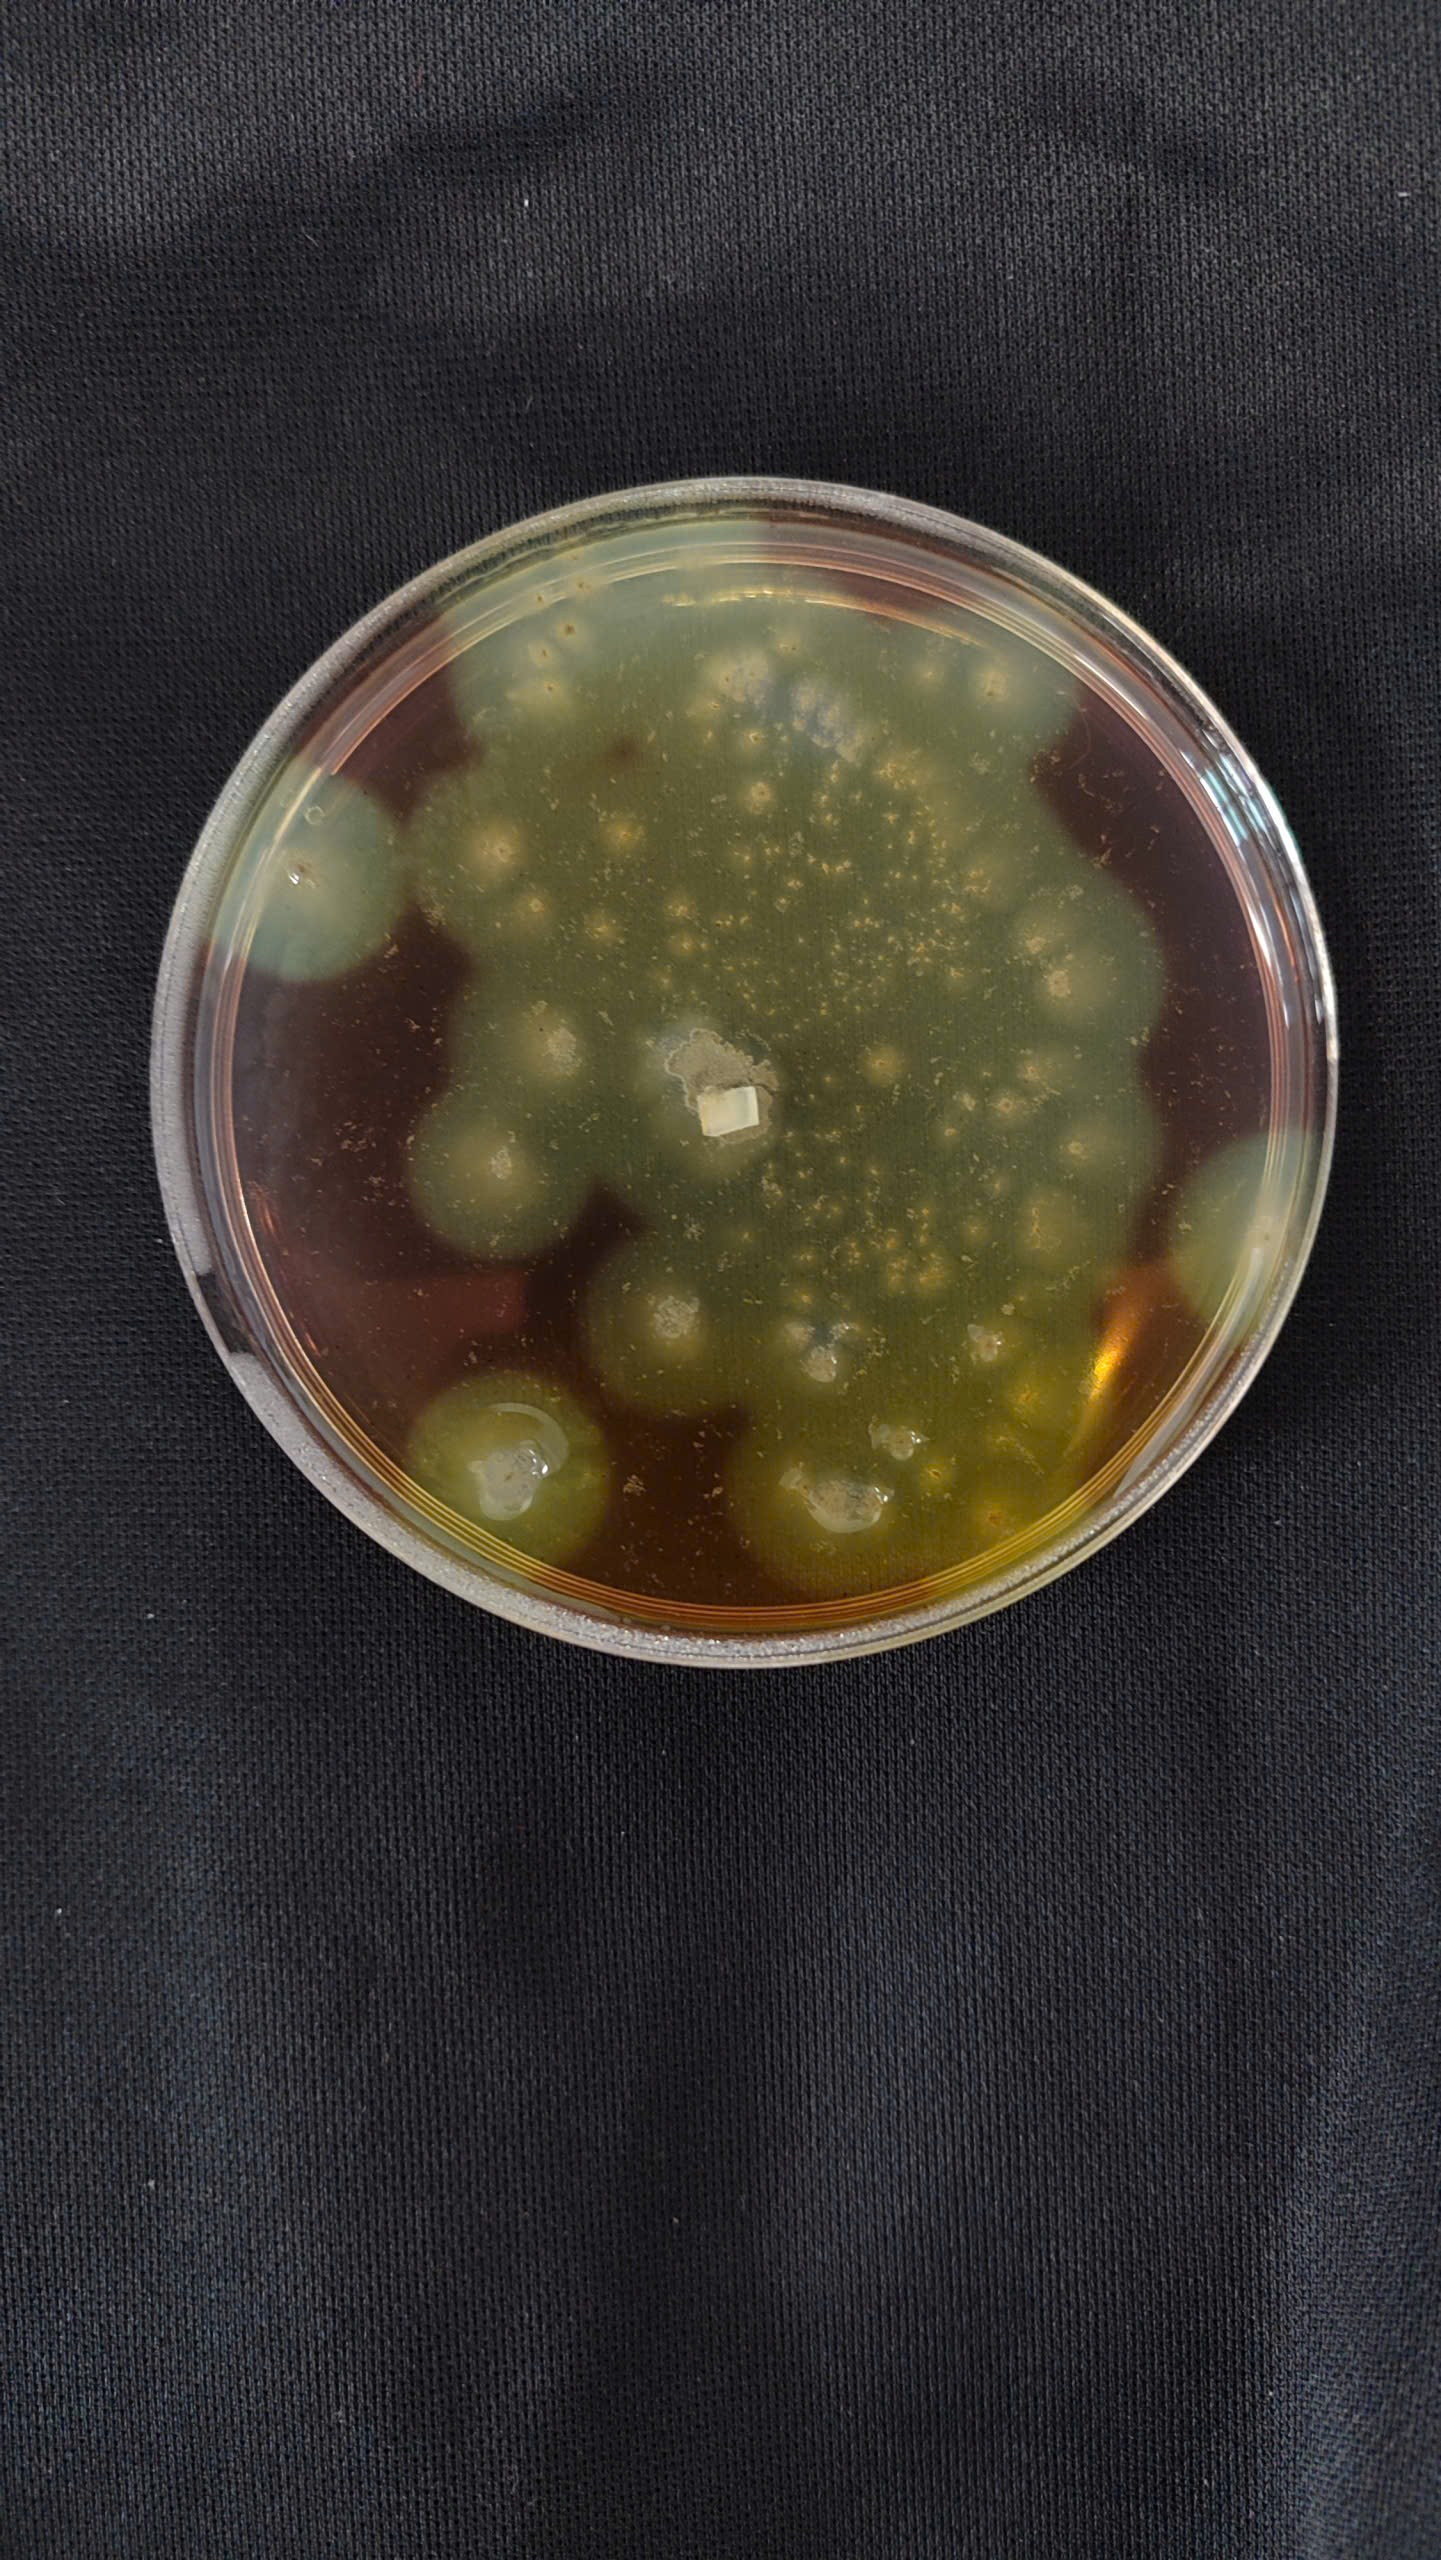


**Figure S1.**Endoglucanase activity of *Penicillium citrinum* M5 on plate by using CMC staining by Lugol's iodine solution

**Supplementary Table S1.** List of fungi and oomycetes used in this study.

| Test fungus | Disease | Host and/or origin* |
| --- | --- | --- |
| *Armillaria rolfsii* KACC40170 | Southern blight | Apple, KACC |
| *Botryosphaeria dothidea* KACC45481 | Apple botryosphaeria canker | Crab apple, KACC |
| *Botrytis cinerea* KACC40574 | Grey mold disease | Tomato, KACC |
| *Colletotrichum coccodes* KACC40010 | Anthracnose | Red pepper, KACC |
| *Collectotrichum horri* | Anthracnose | Persimmon, KRICT |
| *Curvularia lunata* KACC41020 | Curvularia blight | Turf grass, KACC |
| *Cryphonectria parasitica* KACC40323 | Chestnut blight | Chestnut, KACC |
| *Fusarium fujikuroi* | Bakana | Rice, KRICT |
| *Fusarium graminearum* Z-3639 | Fusarium head blight | Wheat (Nguyen et al., 2021) |
| *Fusarium oxysporum* f.sp. *lycorpersici* KR5 | Fusarium wilt | Tomato, KRICT |
| *Fusarium oxysporum* f.sp. *niveum* | Fusarium wilt | Watermelon, KRICT |
| *Fusarium oxysporum* f.sp. *raphanin* | Fusarium wilt | Radish, KRICT |
| *Fusarium verticillioides* | Ear rots | Maize, KRICT |
| *Gaeumannomyces graminis* | Take-all | Turfgrass, DJ |
| *Magnaporthe oryzae* KACC46522 | Rice blast | Rice, KACC |
| *Magnaporthiopsis poae* | Summer patch | Kentucky blue grass, DJ |
| *Ophiostoma ulmi* KACC40252 | Dutch elm disease | Elm, KACC |
| *Pseudocercospora circumcissa* | Cherry leaf spot | Cherry tree, KRICT |
| *Raffaelea quercus-mongolicae* KACC44403 | Oak wilt | Oak, KACC |
| *Rhizoctonia solani* AG-4 KACC40140 | Damping off disease | Cucumber, KACC |
| *Rhizoctonia solani* | Brown patch disease | Zoysia grass, DJ |
| *Rhizoctonia cerealis* | Sharp eyespot | Wheat, KRICT |
| [*Clarireedia*](https://www.sciencedirect.com/science/article/pii/S1878614618300655) *jacksonii* | Dollar spot disease | Creeping bentgrass, DJ |
| *Valsa ceratosperma* KACC40830 | Canker | Apple, KACC |
| *Phytophthora cactorum* KACC40166 | Phytophthora stem rot | Apple, KACC |
| *Phytophthora cambivora* KACC40159 | Phytophthora collar rot | Apple, KACC |
| *Phytophthora capsici* KACC40158 | Phytophthora blight | Pepper, KACC |
| *Phytophthora cinnamomi* KACC40182 | Mating type, root rot, blight | Larch, KACC |
| *Pythium ultimum* KACC40705 | Damping off | Cucumber, KACC |

*KACC = Korean Agriculture collection culture, KRICT = Korean Research Institute of Chemical Technology, DJ=Daejeong-Golf Engineering Co. Ltd.

**Supplementary Table S2.** Cultural characteristics of *Streptomyces* sp. JCK-6116

| JCK-6116 | Cultural characteritistics | | |
| --- | --- | --- | --- |
| Aerial mycelium | Substrate mycelium | Soluble pigment |
| ISP1 | White | Dark-brown | Brown |
| ISP2 | White | Dark-grey | brown |
| ISP3 | White-violet | Pale-yellow | None |
| ISP4 | White-pink | Pale-yellow | None |
| ISP5 | White | White | None |
| Bennet’s | White | Brown | None |
| PDA | white | Brown | None |

**Table 3.** Carbon utilization of JCK-6116

| **No.** | **Carbohydrate sources** | **JCK-6116** | **No.** | **Carbohydrate sources** | **JCK-6116** |
| --- | --- | --- | --- | --- | --- |
| 1 | Glycerol | - | 26 | Salicin | - |
| 2 | Erytrol | - | 27 | D-Celobiose | - |
| 3 | D-Arabinose | - | 28 | D-Maltose | - |
| 4 | L-Arabinose | - | 29 | D-Lactose | - |
| 5 | Ribose | - | 30 | D-Melibiose | - |
| 6 | D-Xylose | - | 31 | D-Sucrose | + |
| 7 | L-Xylose | - | 32 | D-Trehalose | - |
| 8 | D-Adonitol | - | 33 | Inuline | - |
| 9 | Metil-β-D-Xylopyranoside | - | 34 | D-Melezitose | - |
| 10 | Galactose | - | 35 | D-Rafinose | - |
| 11 | Glucose | - | 36 | Starch | - |
| 12 | Fructose | - | 37 | Glycogen | - |
| 13 | Manose | - | 38 | Xylitol | - |
| 14 | Sorbose | - | 39 | Gentiobiose | - |
| 15 | Rhamnose | - | 40 | D-Turanose | - |
| 16 | Dulcitol | - | 41 | D-Lyxose | - |
| 17 | Inozitol | - | 42 | D-Tagatose | - |
| 18 | Manitol | - | 43 | D-Fucose | - |
| 19 | Sorbitol | - | 44 | L-Fucose | - |
| 20 | Metil-α-DManopyranoside | - | 45 | D -Arabitol | - |
| 21 | Metil-α-DGlucopyranoside | - | 46 | L -Arabitol | - |
| 22 | N-Acetyl-glucosamine | - | 47 | Potasium gluconate | - |
| 23 | Amygdaline | - | 48 | 2 -Ketogluconate | - |
| 24 | Arbutine | - | 49 | 5 -Ketogluconate | - |
| 25 | Esculin | + |  |  |  |

+ Positive; - negative

**Table S4.** Enzyme activity of strain JCK-6116

| **No.** | **Enzyme assayed for** | **JCK-6116** |
| --- | --- | --- |
| 1 | Control | - |
| 2 | Alkaline phosphatase | + |
| 3 | Esterase (C4) | + |
| 4 | Esterase Lipase (C8) | + |
| 5 | Lipase (C14) | + |
| 6 | Leucine arylamidase | + |
| 7 | Valinearyl lamidase | + |
| 8 | Cysteine arylamidase | + |
| 9 | Trypsin | + |
| 10 | α-Chymotrypsin | + |
| 11 | Acid phosphatase | + |
| 12 | Naphthol-AS-BI-phosphohydrolase | + |
| 13 | α-Galactosidase | - |
| 14 | β-Galactosidase | - |
| 15 | β-Glucuronidase | - |
| 16 | α-Glucosidase | - |
| 17 | β-Glucosidase | + |
| 18 | N-acetyl-β-gucosaminidase | + |
| 19 | α-Mannosidase | + |
| 20 | α-Fucosidase | - |
| 21 | Protease | + |
| 22 | Chitinase | + |
| 23 | Cellulase | - |

+ Positive; - negative

**Supplementary Table S5**

Carbon utilization of strain JCK-6116 and *Streptomyces mauvecolor* ATCC 29835

| Characteristics | | JCK-6116 | *Streptomyces mauvecolor* ATCC 29835 |
| --- | --- | --- | --- |
| Carbon utilization | D-glucose | - | + |
| Arabinose | - | + |
| Sucrose | + | - |

+ Positive; - negative

**Supplementary Table S6.** *In vitro* antifungal activity of culture filtrate against mycelial growth of fungi and oomycete

| No. | Number of Isolates | MIC (%) | | | | | | |
| --- | --- | --- | --- | --- | --- | --- | --- | --- |
| *Pythium ultimum* | *Rhizoctonia solani* AG-4 | *F.oxy.* f.sp*. cucumberinum* KR5 | *F graminearum* | *S. homoeocarpa* | *R. solani* |
| 1 | JCK-6016 | 10 | >10 | - | 1.25 | >10 | - |
| 2 | JCK-6022 | 5 | 5 | 5 | 1.25 | 10 | - |
| 3 | JCK-6030 | 1.25 | 0.63 | 2.5 | >10 | - | - |
| 4 | JCK-6032 | >10 | 0.16 | 2.5 | >10 | 5 | - |
| 5 | JCK-6036 | 1.25 | 10 | >10 | 2.5 | 5 | - |
| 6 | JCK-6043 | 0.63 | >10 | >10 | 1.25 | 2.5 | - |
| 7 | JCK-6063 | 0.16 | 1.25 | 1.25 | 2.5 | 10 | 2.5 |
| 8 | JCK-6068 | 1.25 | 1.25 | 5 | 2.5 | 0.63 | 1.25 |
| 9 | JCK-6072 | 0.63 | 0.16 | - | 1.25 | 1.25 | 2.5 |
| 10 | JCK-6095 | 10 | >10 | - | >10 | 5 | - |
| 11 | JCK-6099 | 10 | 0.63 | 5 | >10 | 2.5 | 10 |
| 12 | JCK-6102 | 1.25 | 0.16 | 2.5 | 2.5 | 0.63 | 1.25 |
| 13 | JCK-6110 | 1.25 | 1.25 | 1.25 | 2.5 | 2.5 | 0.625 |
| 14 | JCK-6116 | 1.25 | 0.16 | 2.5 | 2.5 | 0.63 | 0.31 |
| 15 | *Streptomyces* sp. JCK-6141 (Nguyen et al., 2021) | 0.31 | 0.63 | 0.31 | 0.08 | 0.63 | 2.5 |

-: No activity at test concentration


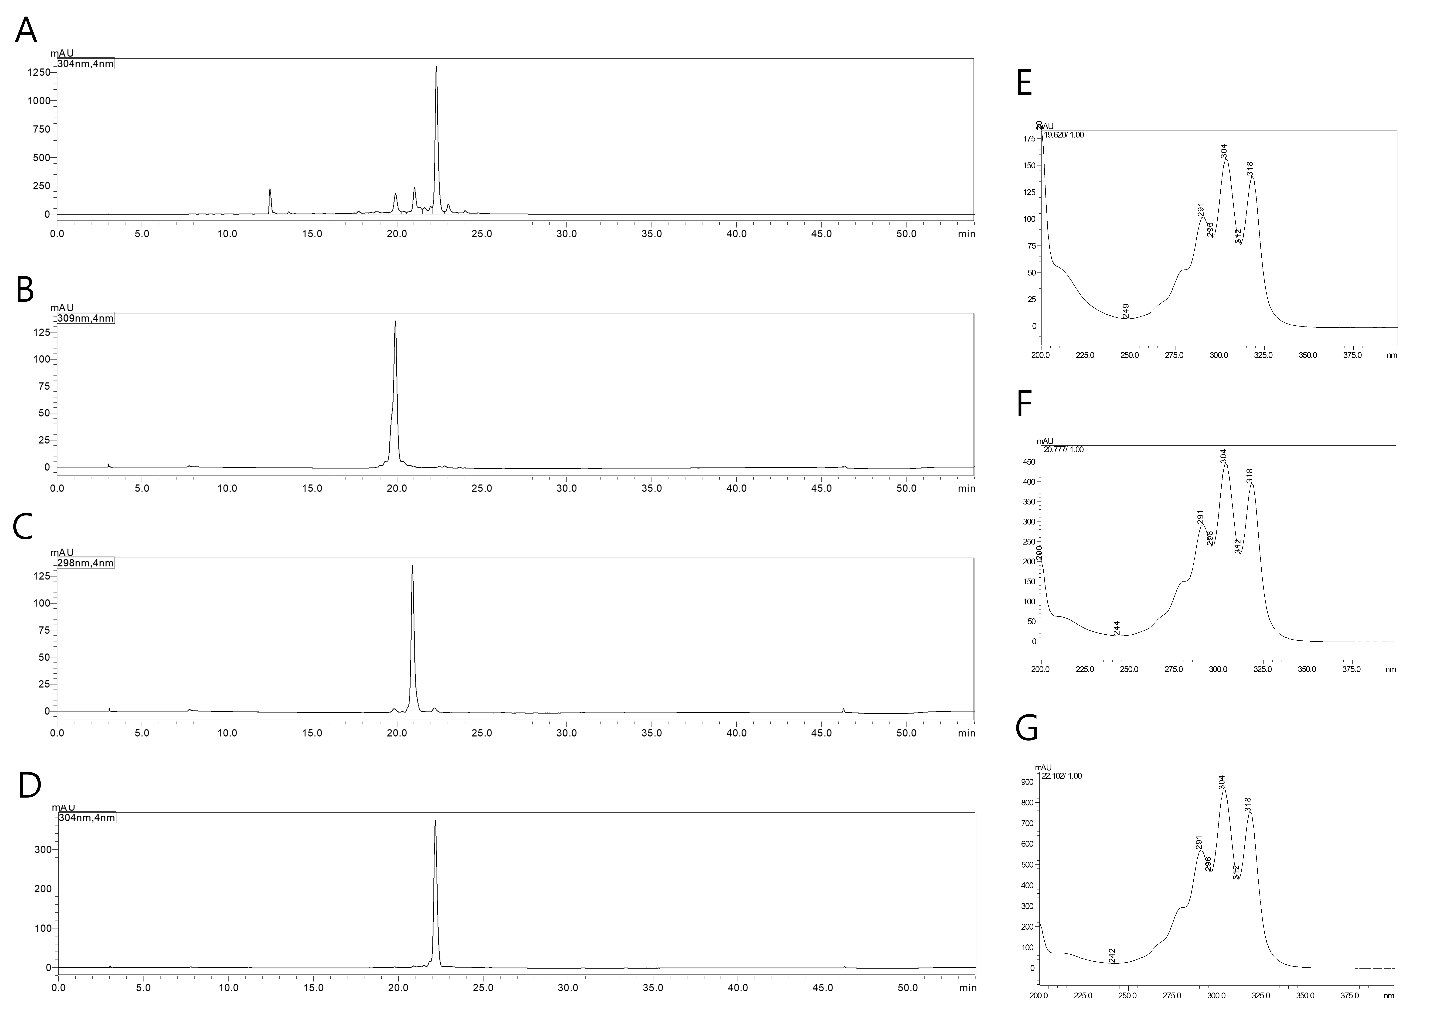


**Supplementary** **Figure S1** : HPLC chromatograms of BuOH extract (A), rimocidin C (B), rimocidin B (C), rimocidin A (D) and UV spectra of rimocidin C (E), rimocidin B (F), rimocidin A (G) which derived from JCK-6116

**Supplementary Figure S2:** Standard curve of rimocidin A

Luo, F., Gwak, H., Park, A.R., Nguyen, V.T., Kim, J.-C., Biocontrol potential of natamycin-producing *Streptomyces lydicus* JCK-6019 against soil-borne fungal diseases of cucumber and characterization of its biocontrol mechanism. Pest Management Science n/a.

Nguyen, H.T.T., Park, A.R., Hwang, I.M., Kim, J.-C., 2021. Identification and delineation of action mechanism of antifungal agents: Reveromycin E and its new derivative isolated from *Streptomyces* sp. JCK-6141. Postharvest Biology and Technology 182, 111700.

Nguyen, L.T.T., Park, A.R., Van Le, V., Hwang, I., Kim, J.-C., 2024. Exploration of a multifunctional biocontrol agent Streptomyces sp. JCK-8055 for the management of apple fire blight. Applied Microbiology and Biotechnology 108, 49.
